# Supplementary material
Source: Research Square preprint supplement (doi:10.21203/rs.3.rs-7723539/v1)
Supplement: Supplementary file [file 69c2bccb2375c6f261e9723b.pdf]

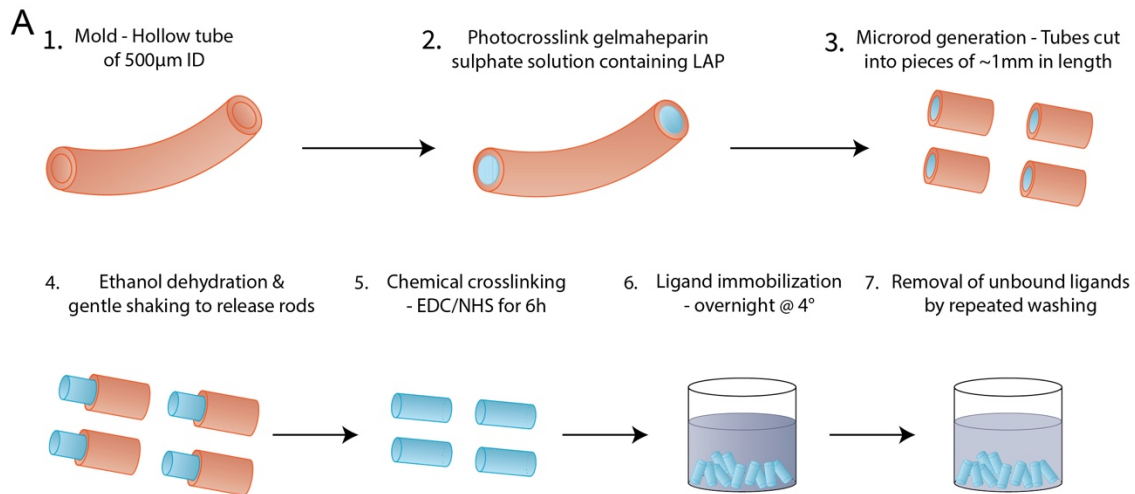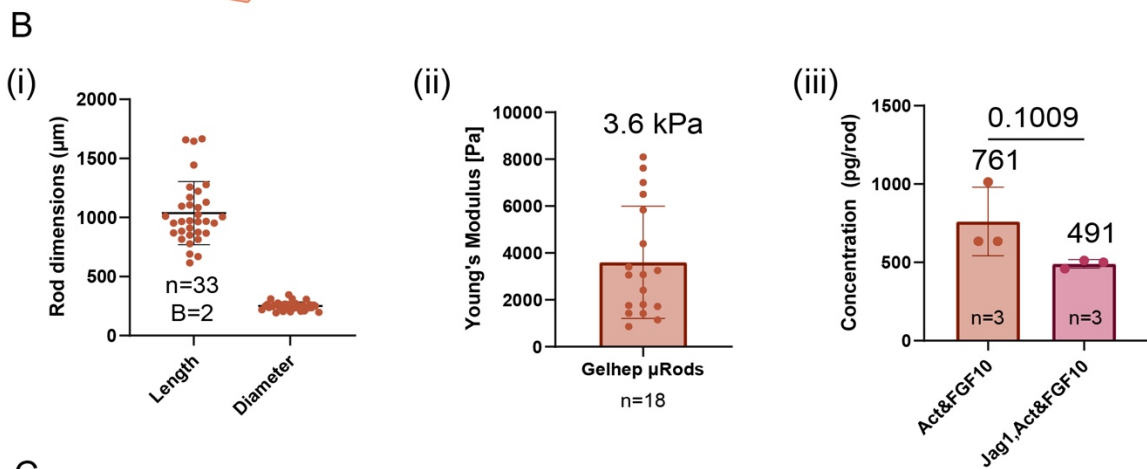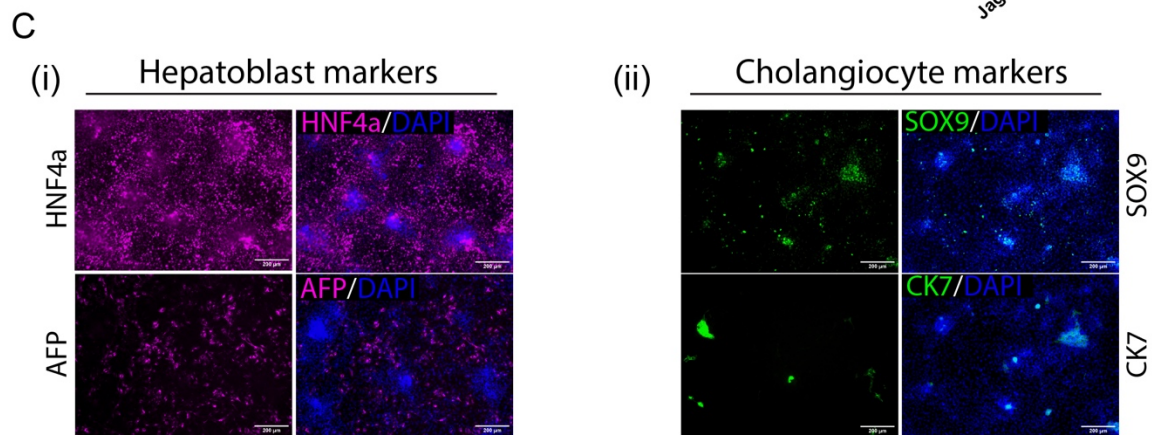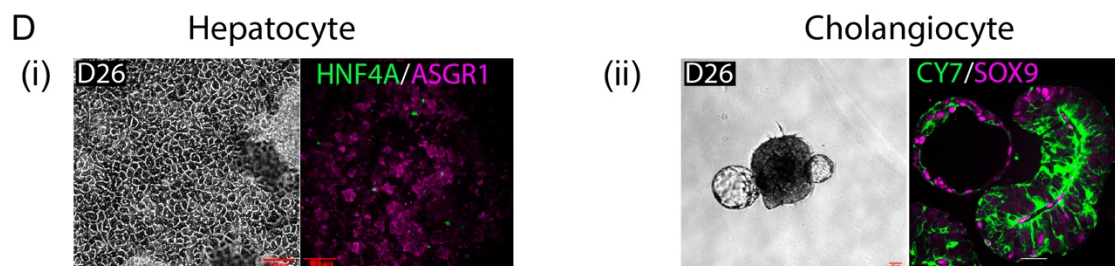

Supplementary Figure 1:

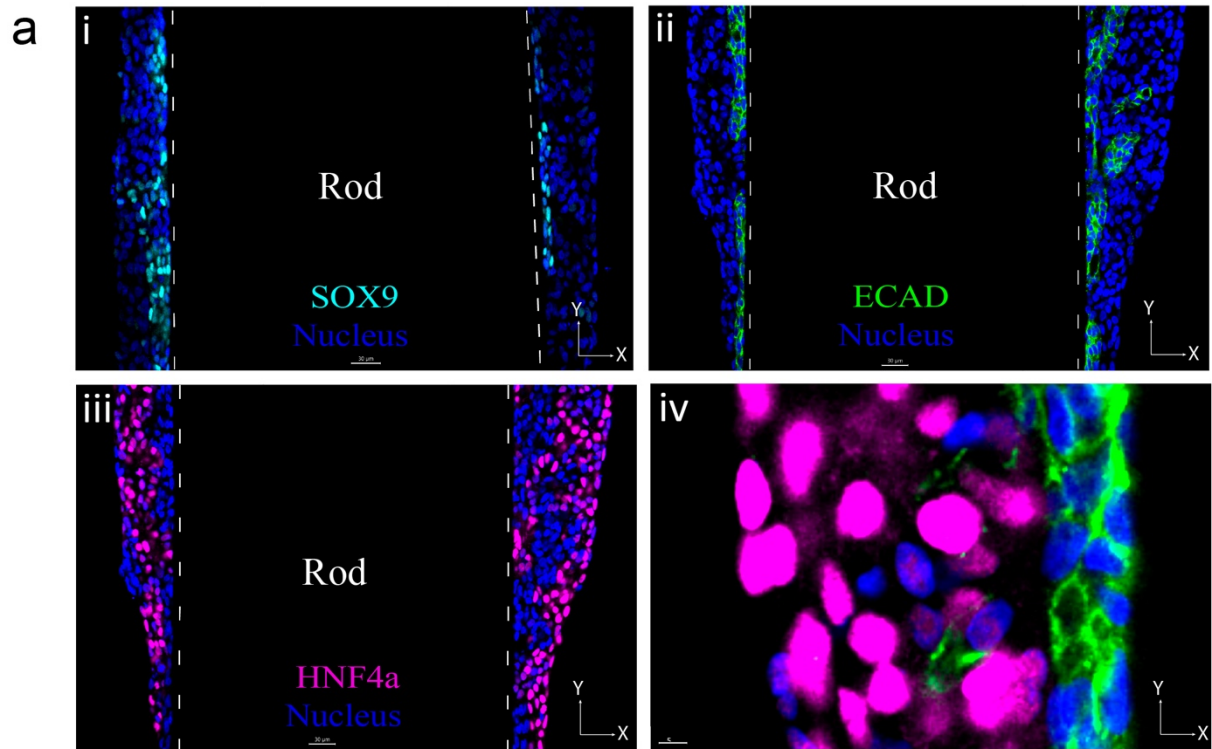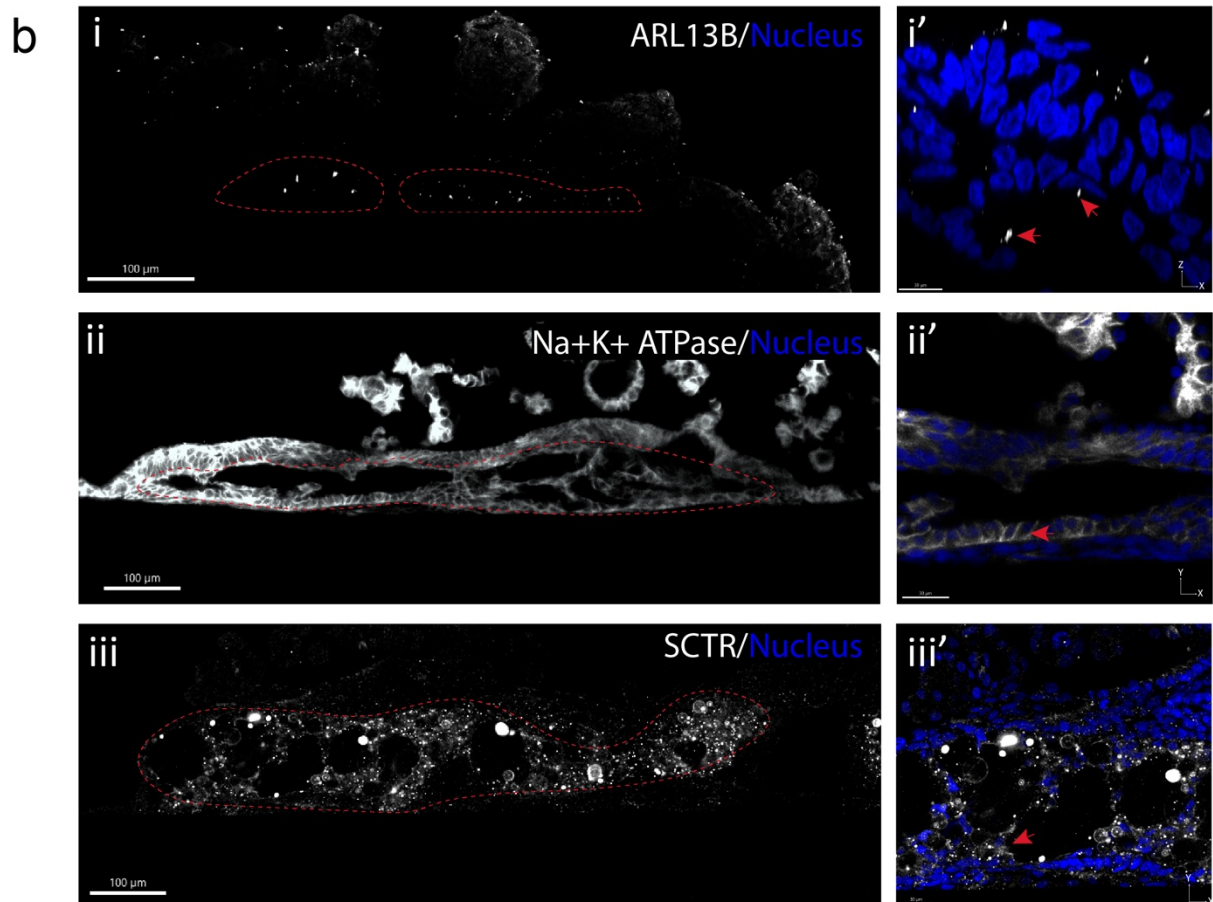

**Supplementary Figure 2:**

**a**

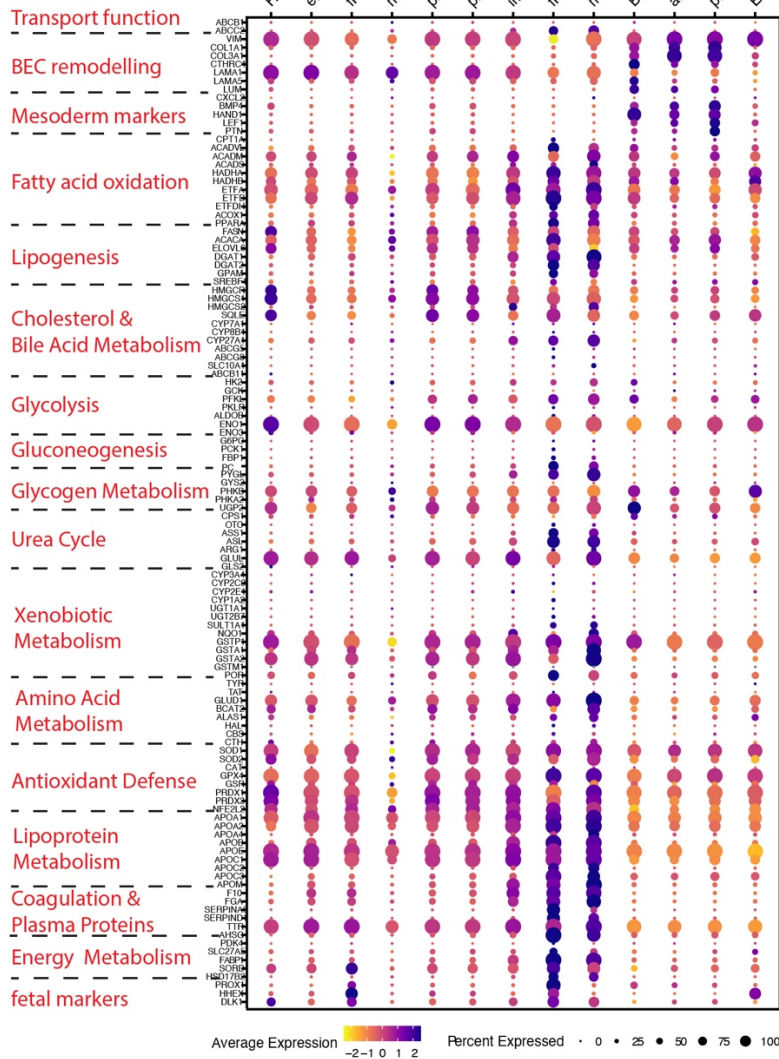

**c**

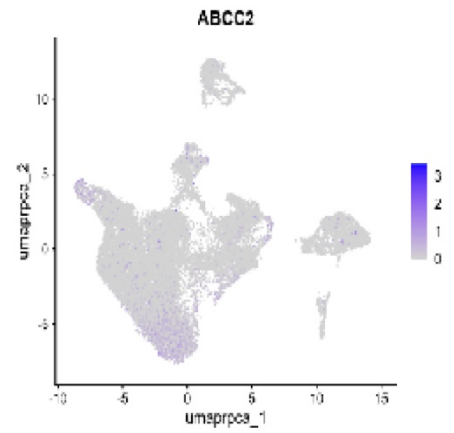

**d**

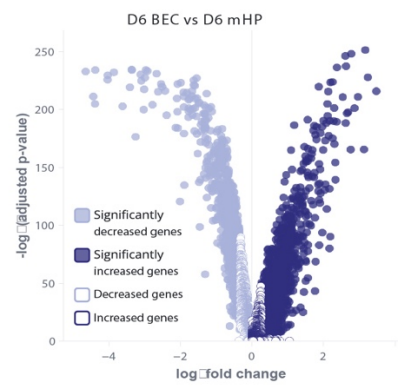

**b**

**Biliary Epithelial Cells**

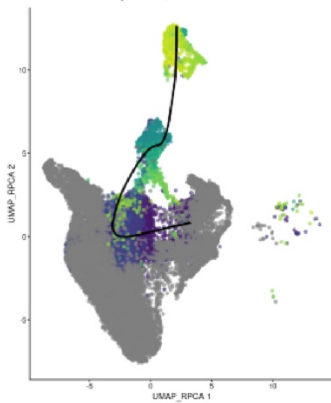

**Mature Hepatocytes**

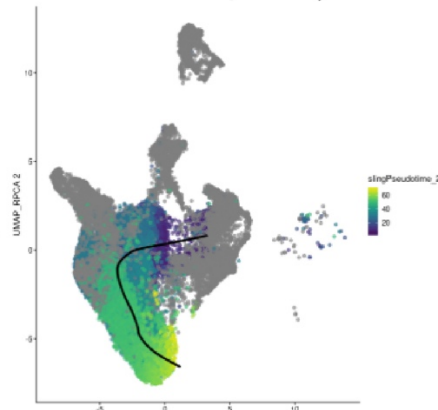

**Fetal Hepatocytes**

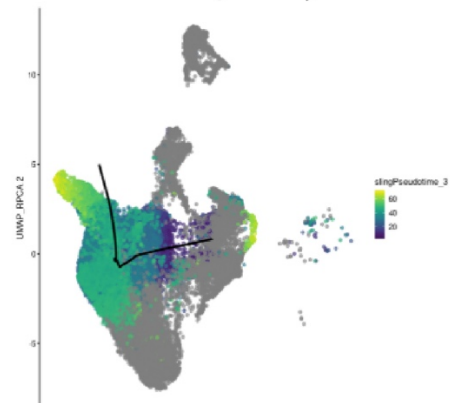

**Supplementary Figure 3:**

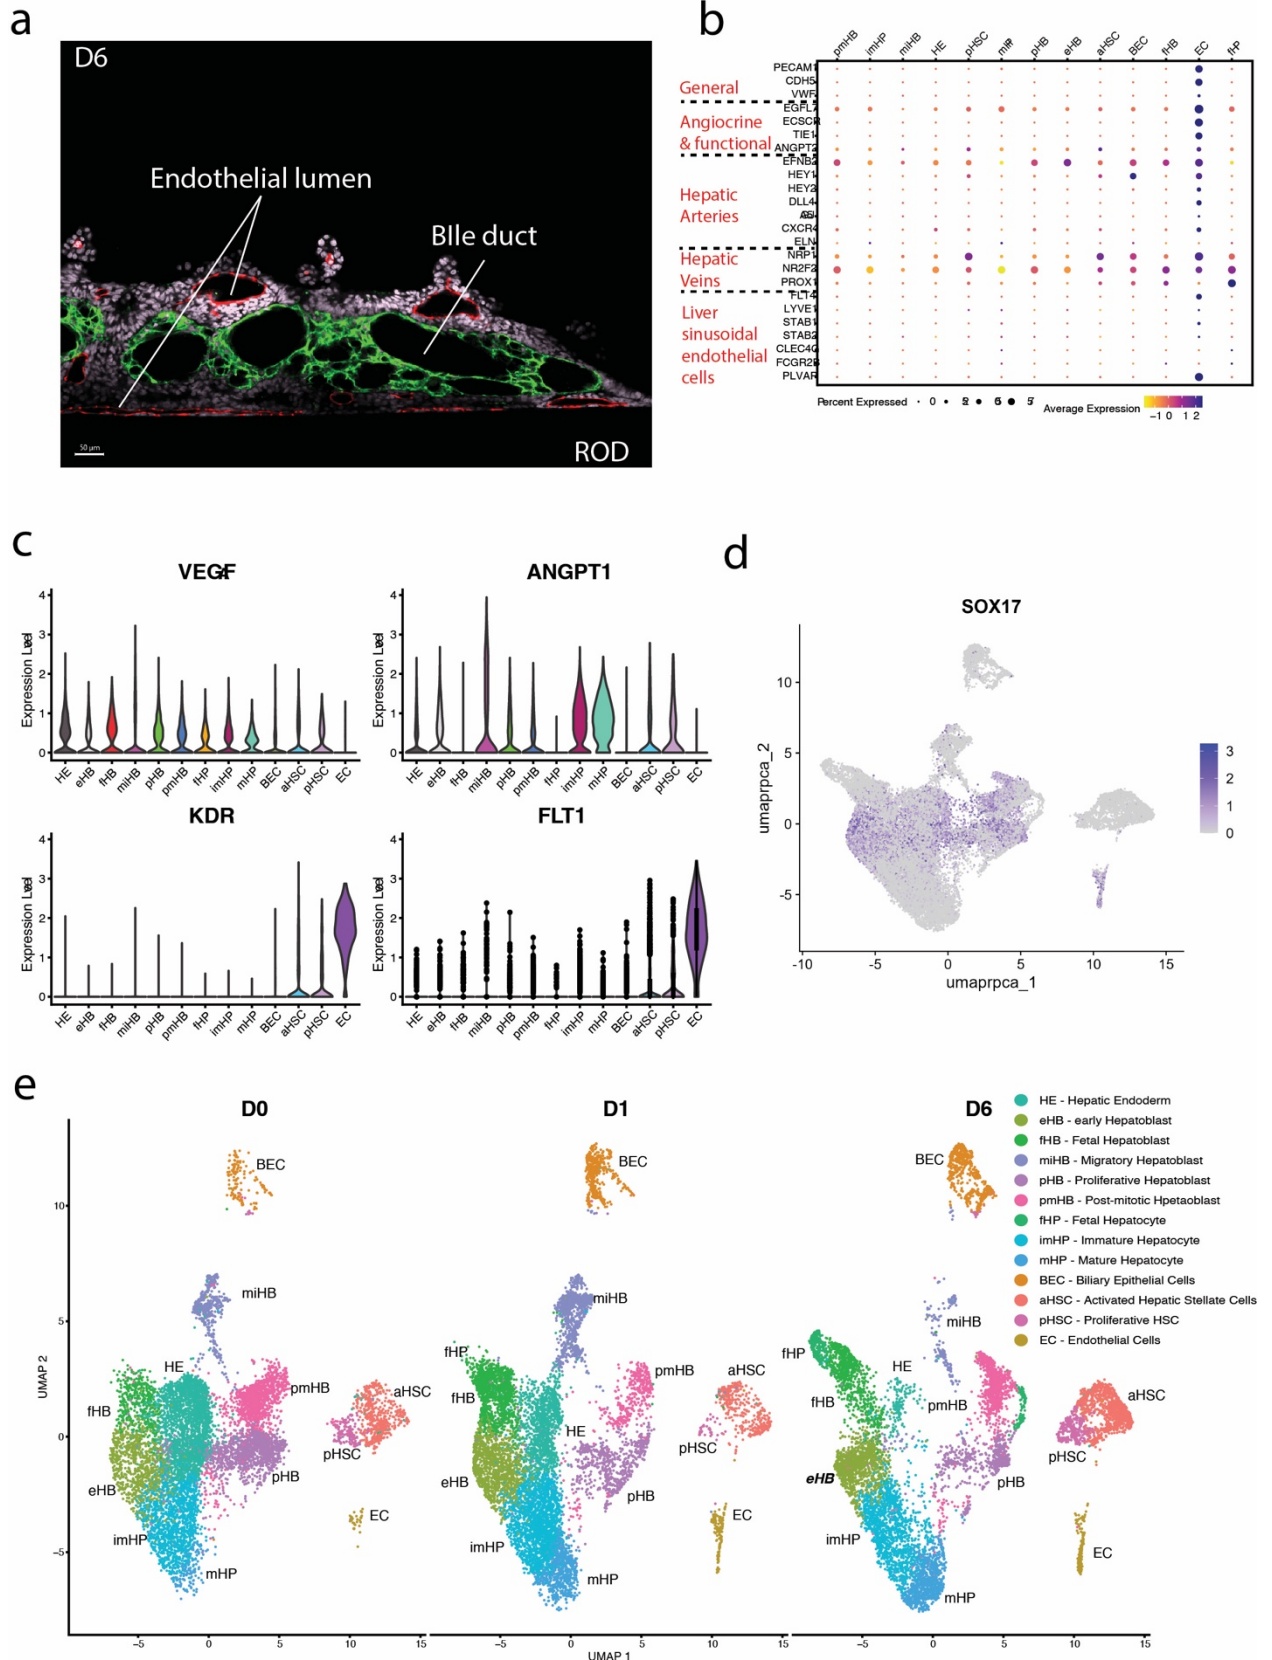

Supplementary Figure 4:

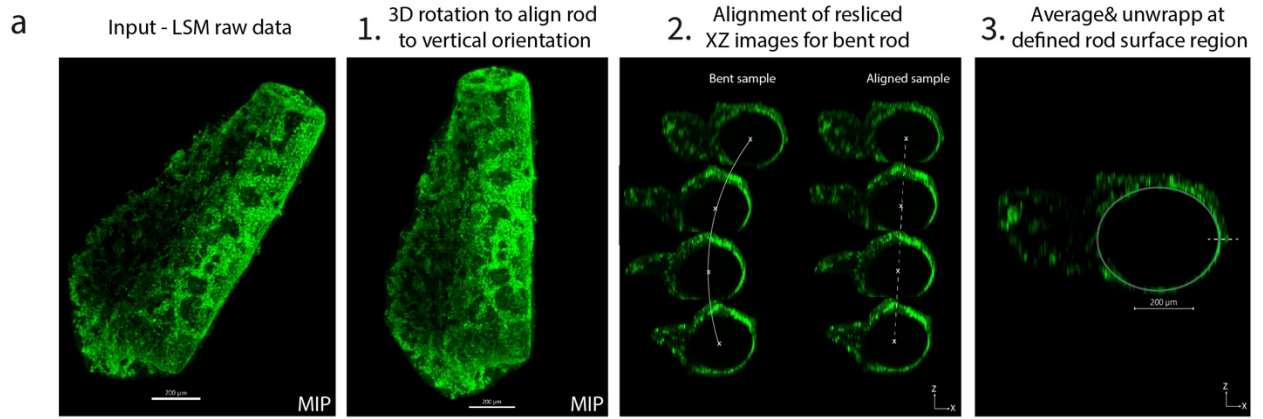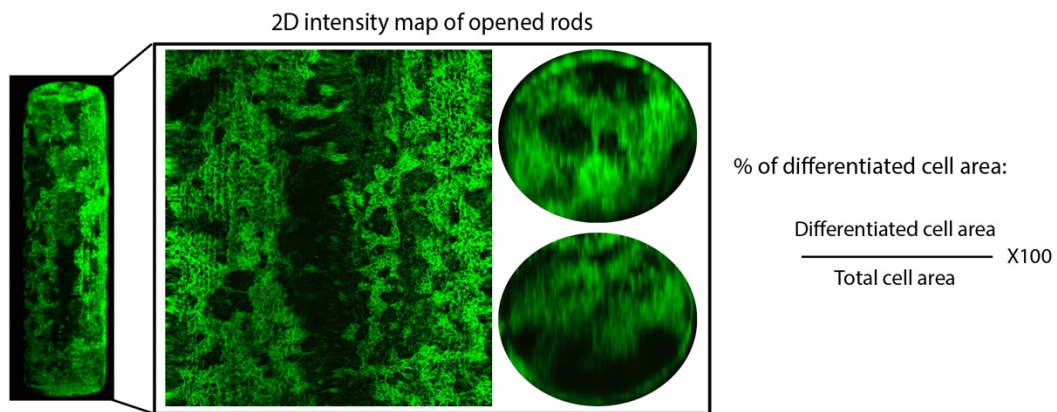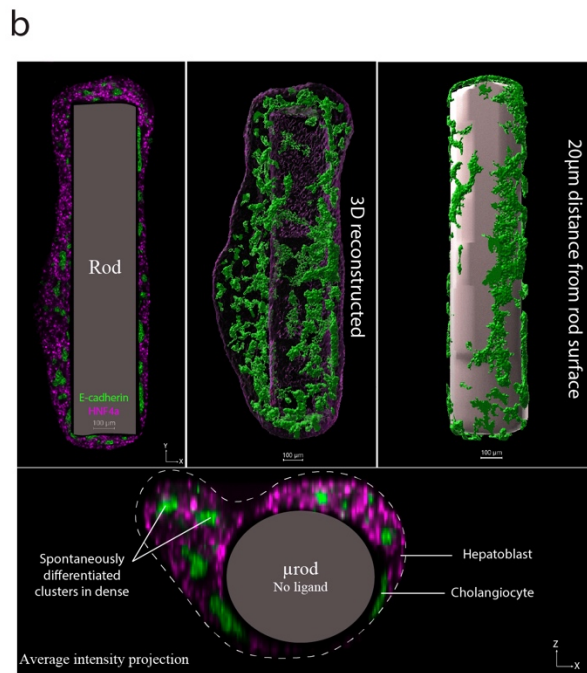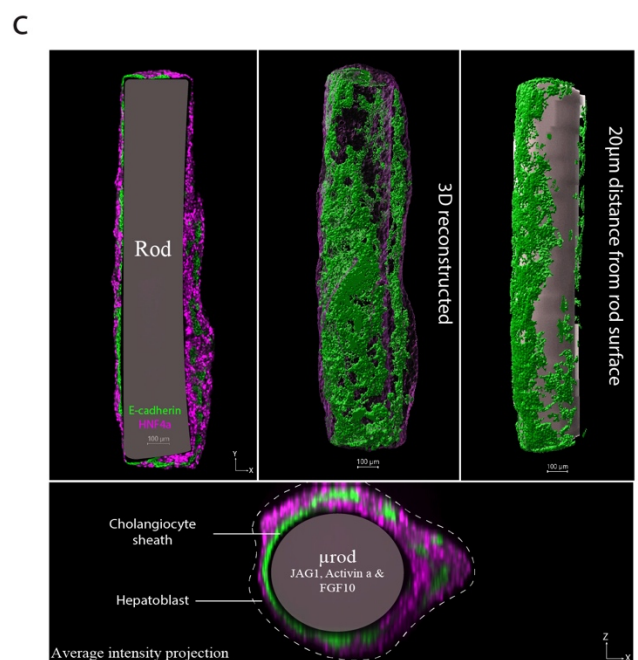

**Supplementary Figure 5:**

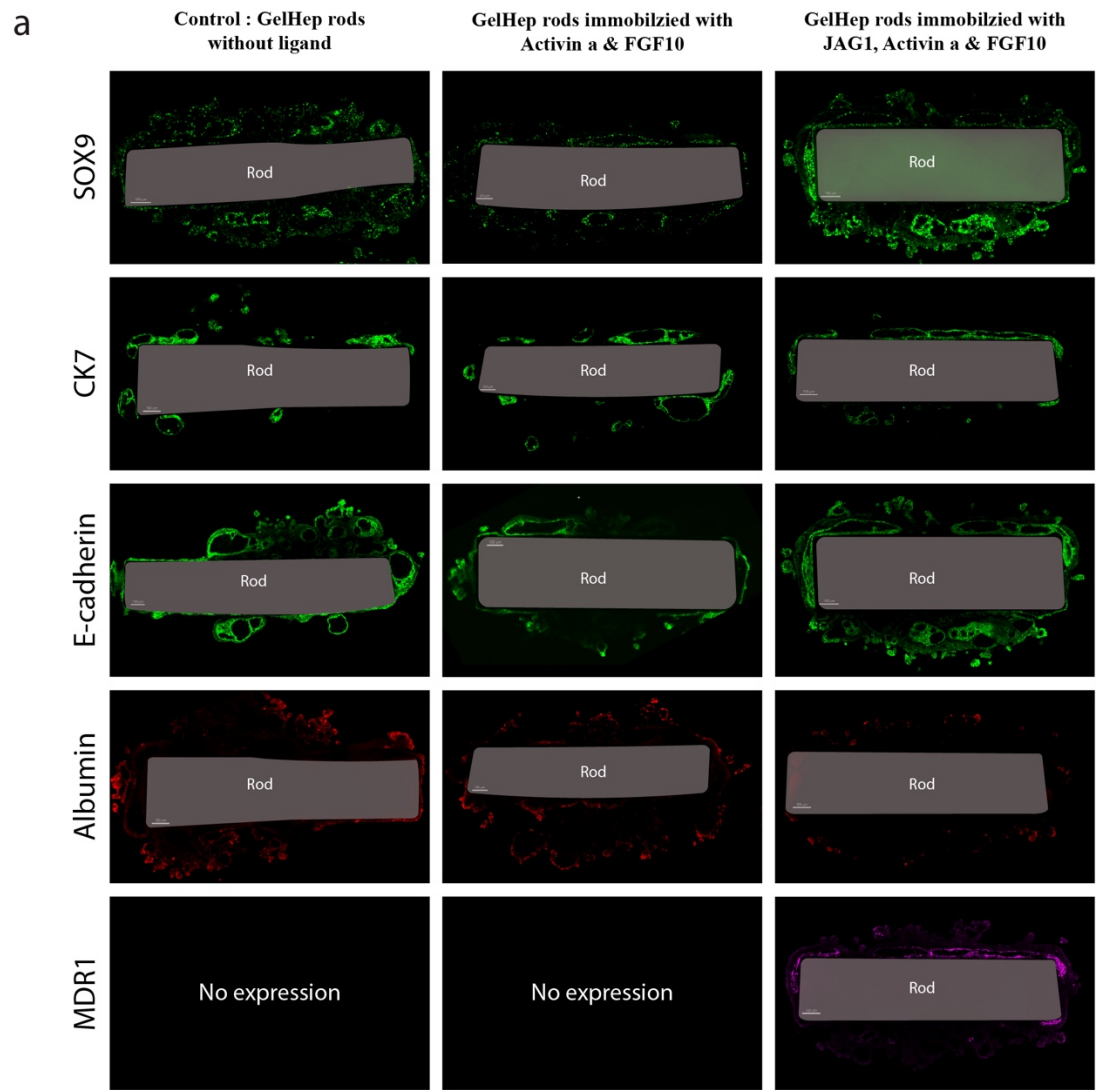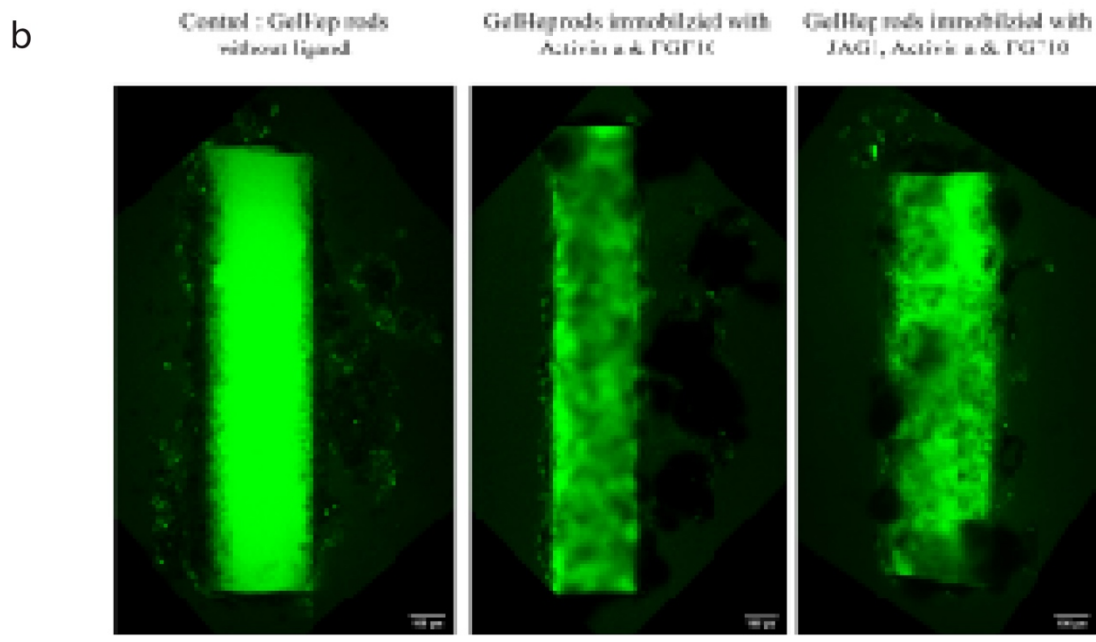

Supplementary Figure 6:

**a**

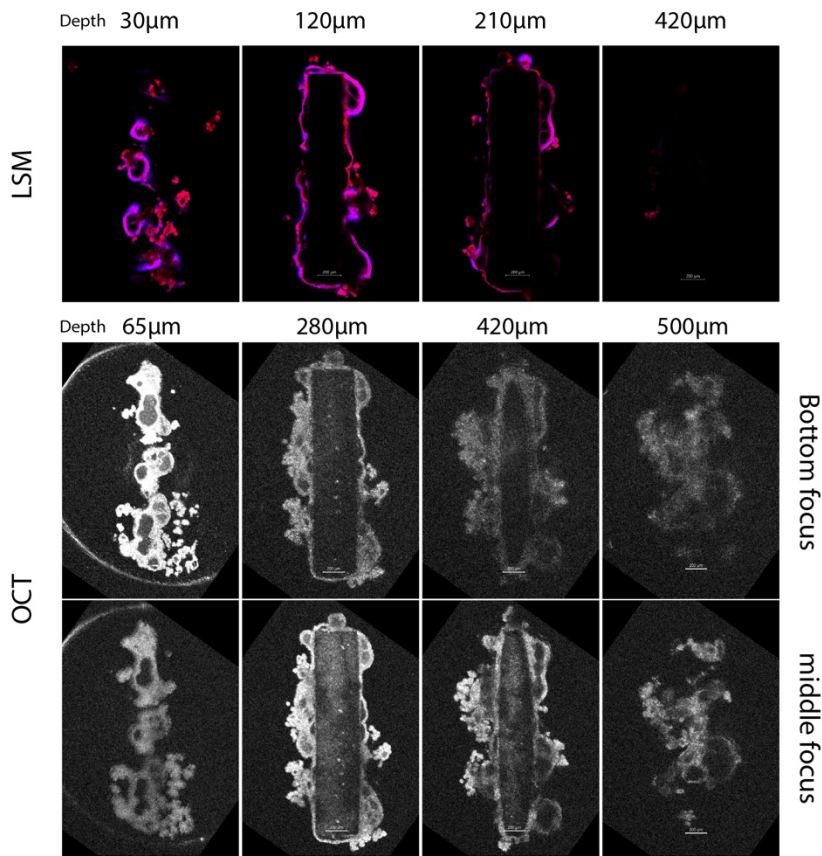

**b**

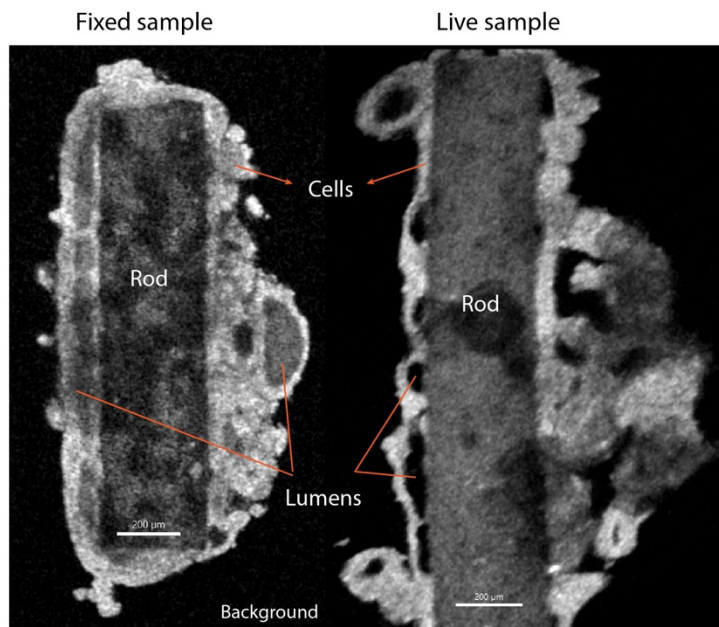

**Supplementary Figure 7:**

# High content imaging and image analysis pipeline

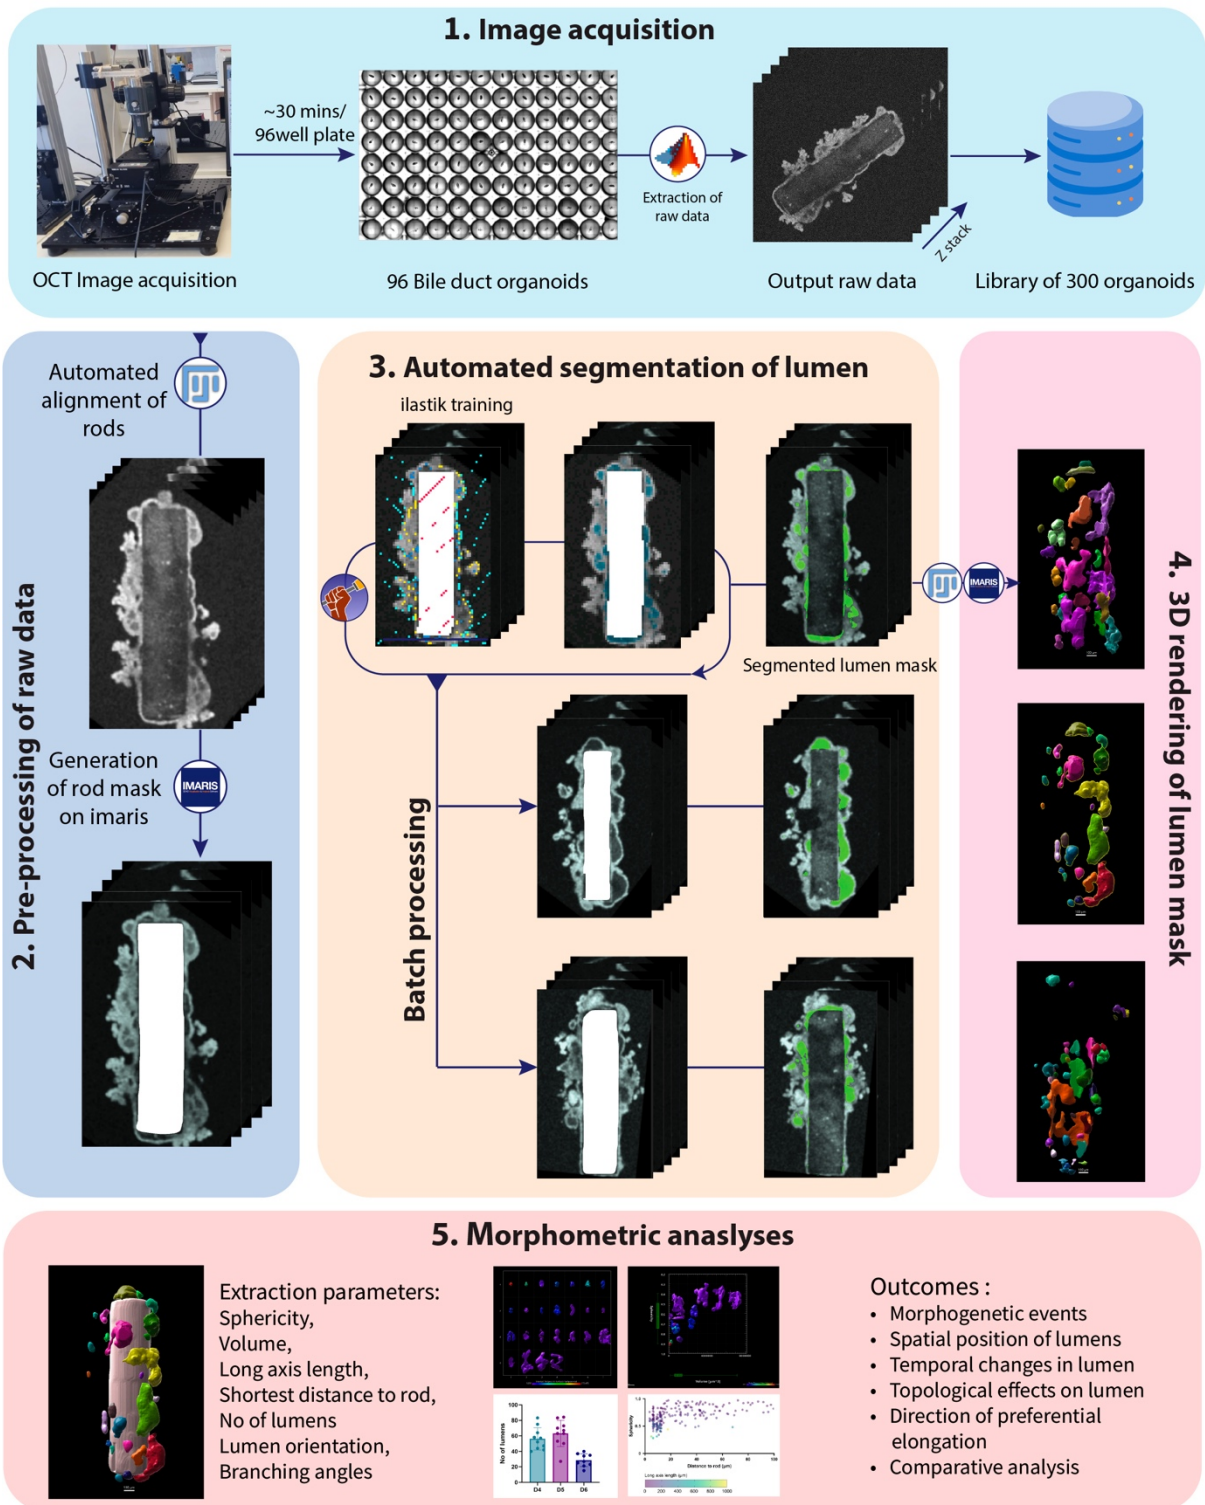

Supplementary Figure 8:

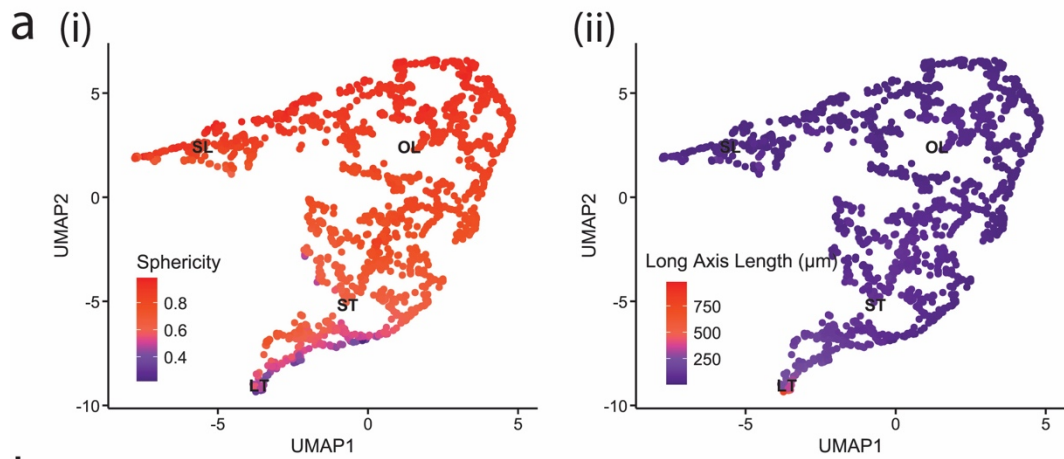

**b**

Timepoint

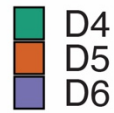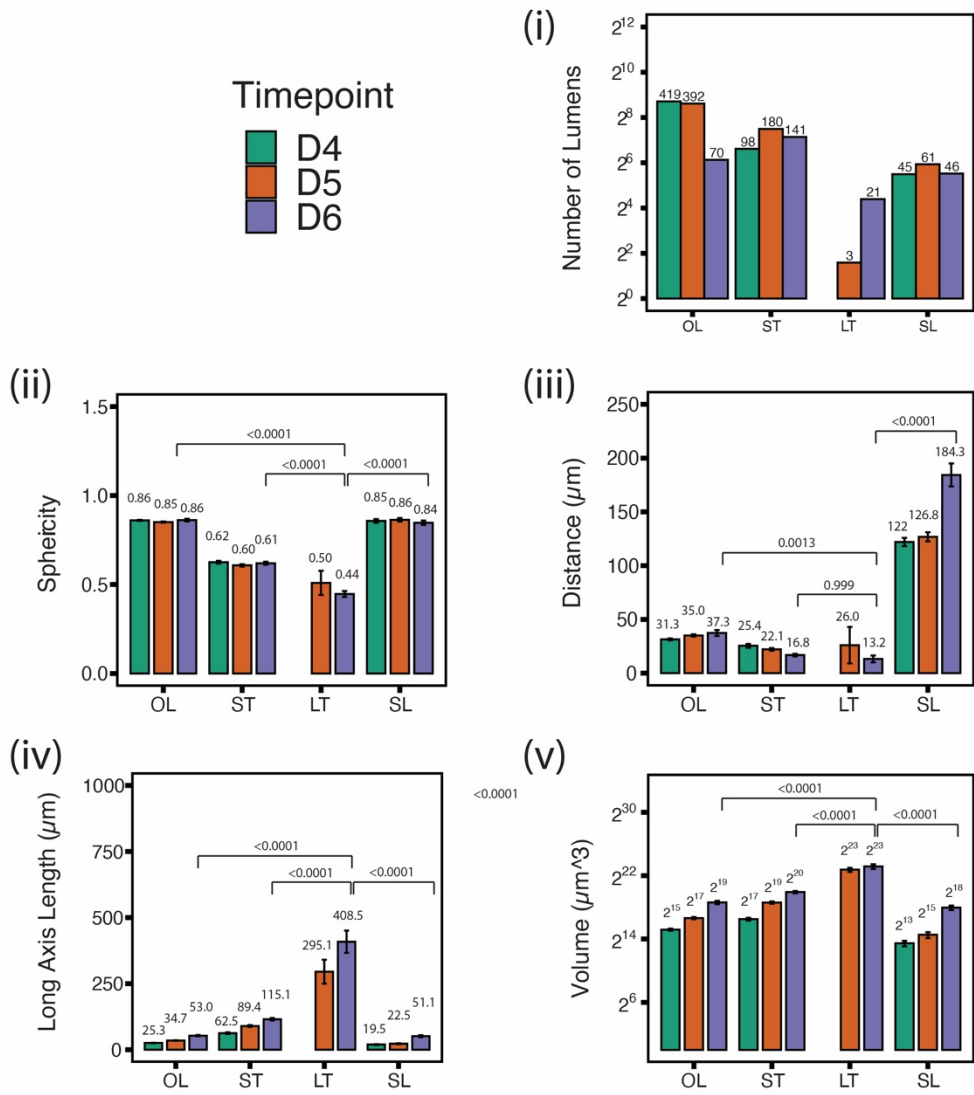

**Supplementary Figure 9:**

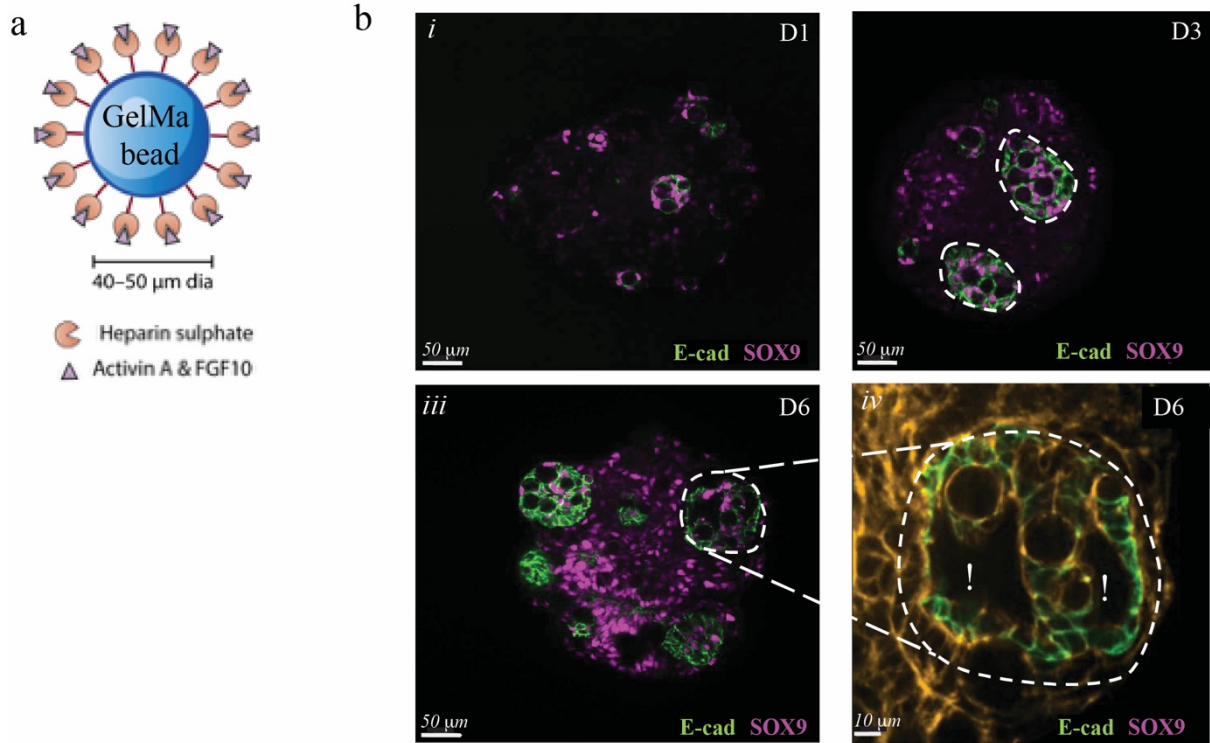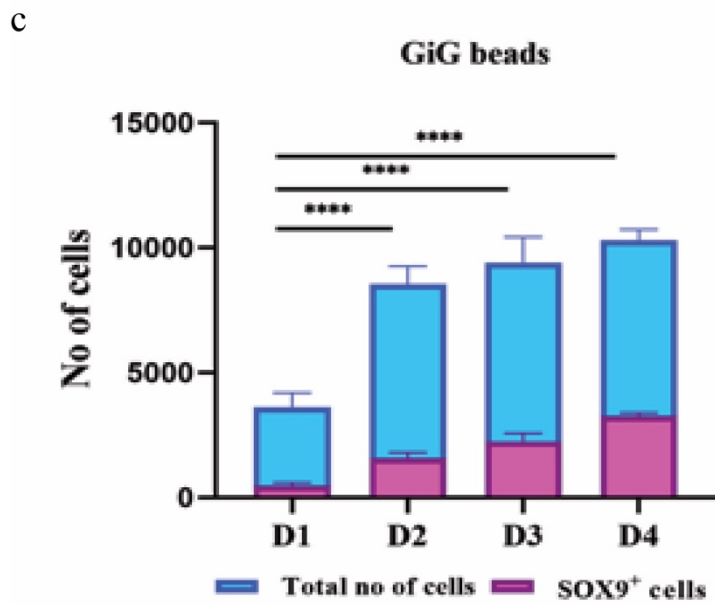

Supplementary Figure 10:

a

Condition

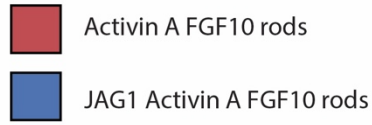

ii

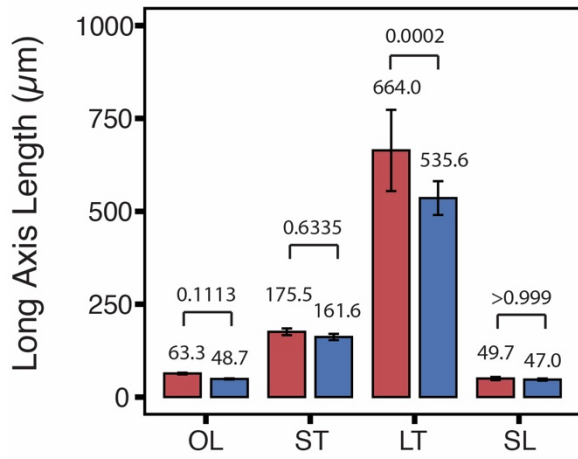

i

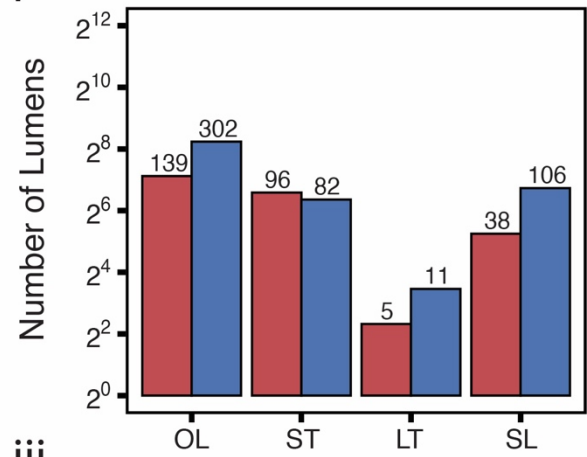

iii

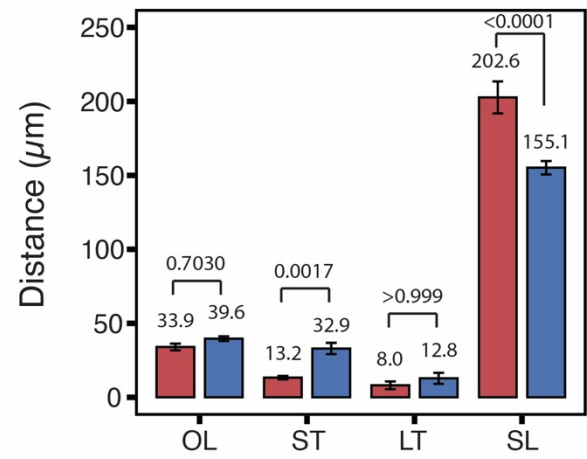

iv

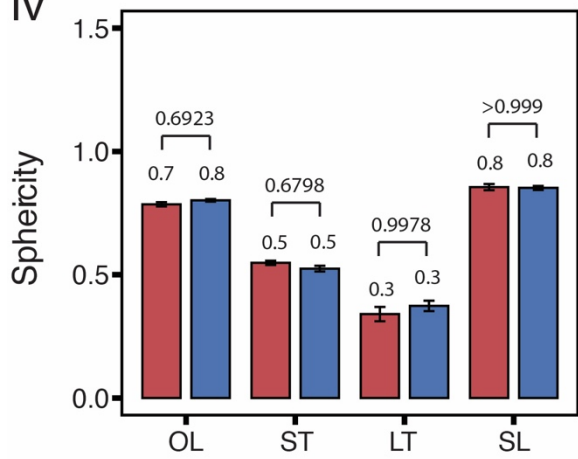

v

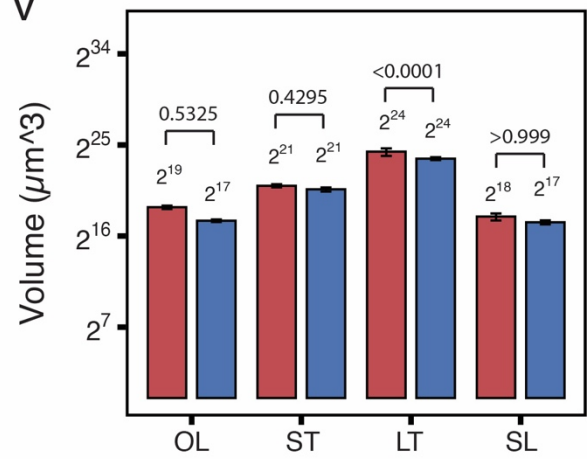

Supplementary Figure 11:
